# Supplementary material for: Peak Plasma Levels of mtDNA Serve as a Predictive Biomarker for COVID-19 in-Hospital Mortality
Source: MDPI journal article supplement (doi:10.3390/jcm11237161), 2022-12-01
Supplement: s1 [file s1]

**Table S1:** Overview on the laboratory parameters. All data are shown as median with interquartile range or percentage. *Abbreviations:* CRP = C reactive protein; GFR = glomerular filtration rate; GOT = glutamate oxalate transaminase; GPT = glutamate pyruvate transaminase; INR = international normalized ratio; LDH = lactate dehydrogenase; PCT = procalcitonin; U = Units.

|                                                      |           | COVID-19 (n = 29)     | Controls (n = 29) | p-Value |
|------------------------------------------------------|-----------|-----------------------|-------------------|---------|
| Leucocytes<br>(10 <sup>9</sup> /L)                   | Admission | 10.0 [7.2 – 15.7]     | 7.6 [6.6 – 9.1]   | 0.73    |
|                                                      | 24 h      | 9.6 [7.5 – 16.5]      | NA                | 0.38    |
|                                                      | 72 h      | 12.9 [9.3 – 18.9]     | NA                | 0.009   |
| Lymphocytes<br>(10 <sup>9</sup> /L)                  | Admission | 0.46 [0.31 – 0.78]    | NA                |         |
|                                                      | 24 h      | 0.40 [0.30 – 0.53]    | NA                |         |
|                                                      | 72 h      | 0.63 [0.34 – 0.96]    | NA                |         |
| Thrombocytes<br>(10 <sup>9</sup> /L)                 | Admission | 210 [151 – 286]       | 250 [212 – 281]   | 1.00    |
|                                                      | 24 h      | 215 [171 – 265]       | NA                | 1.00    |
|                                                      | 72 h      | 245 [151 – 332]       | NA                | 1.00    |
| Neutrophilic<br>granulocytes<br>(10 <sup>9</sup> /L) | Admission | 9.4 [6.2 – 15.1]      | NA                |         |
|                                                      | 24 h      | 8.3 [7.4 – 11.0]      | NA                |         |
|                                                      | 72 h      | 12.1 [8.4 – 17.8]     | NA                |         |
| CRP<br>(mg/L)                                        | Admission | 155.4 [131.1 – 205.3] | 2.1 [0.5 – 5.3]   | < 0.001 |
|                                                      | 24 h      | 149.8 [121.1 – 231.4] | NA                | < 0.001 |
|                                                      | 72 h      | 131.7 [67.8 – 125.4]  | NA                | < 0.001 |
| PCT<br>(µg/L)                                        | Admission | 4.7 [2.6 – 7.3]       | NA                |         |
|                                                      | 24 h      | 5.7 [3.8 – 11.6]      | NA                |         |
|                                                      | 72 h      | 5.9 [4.3 – 10.2]      | NA                |         |
| Interleukin 6<br>(pg/mL)                             | Admission | 49.5 [35.1 – 149.8]   | NA                |         |
|                                                      | 24 h      | 17.1 [13.6 – 37.4]    | NA                |         |
|                                                      | 72 h      | 20.9 [0.0 – 54.8]     | NA                |         |
| Ferritin<br>(ng/mL)                                  | Admission | 1171 [432 – 1905]     | 240 [127 – 887]   | 1.00    |
|                                                      | 24 h      | 1516 [427 – 2487]     | NA                | 1.00    |
|                                                      | 72 h      | 1159 [451 – 2163]     | NA                | 1.00    |
| INR                                                  | Admission | 1.0 [1.0 – 1.1]       | 0.9 [0.9 – 0.9]   | 0.55    |
|                                                      | 24 h      | 1.0 [1.0 – 1.2]       | NA                | 0.25    |
|                                                      | 72 h      | 1.0 [1.0 – 1.1]       | NA                | 0.93    |
| Fibrinogen<br>(g/L)                                  | Admission | 4.8 [4.1 – 6.2]       | NA                |         |
|                                                      | 24 h      | 5.4 [4.4 – 6.7]       | NA                |         |
|                                                      | 72 h      | 4.9 [3.9 – 6.0]       | NA                |         |
| D-Dimers<br>(µg/mL)                                  | Admission | 1.8 [0.8 – 4.8]       | NA                |         |
|                                                      | 24 h      | 1.7 [0.9 – 3.5]       | NA                |         |
|                                                      | 72 h      | 2.5 [0.8 – 5.3]       | NA                |         |
| Creatinine<br>(mg/dL)                                | Admission | 1.2 [0.9 – 2.2]       | 0.9 [0.8 – 1.0]   | 1.00    |
|                                                      | 24 h      | 1.2 [0.9 – 2.0]       | NA                | 1.00    |
|                                                      | 72 h      | 1.6 [1.0 – 2.5]       | NA                | 1.00    |
| Urea<br>(mg/dL)                                      | Admission | 68 [49 – 82]          | 31 [26 – 90]      | 1.00    |
|                                                      | 24 h      | 69 [55 – 98]          | NA                | 1.00    |
|                                                      | 72 h      | 103 [66 – 138]        | NA                | 0.07    |
| GFR<br>(mL/min)                                      | Admission | 49 [31 – 90]          | 86 [57 – 105]     | 1.00    |
|                                                      | 24 h      | 52 [30 – 90]          | NA                | 1.00    |

|       |           |                 |                 |      |
|-------|-----------|-----------------|-----------------|------|
|       | 72 h      | 41 [24 – 79]    | NA              | 0.41 |
| GOT   | Admission | 64 [37 – 105]   | 25 [19 – 30]    | 0.92 |
| (U/L) | 24 h      | 73 [36 – 128]   | NA              | 1.00 |
|       | 72 h      | 64 [39 – 118]   | NA              | 0.19 |
| GPT   | Admission | 35 [27 – 57]    | 23 [17 – 36]    | 0.46 |
| (U/L) | 24 h      | 41 [31 – 69]    | NA              | 0.56 |
|       | 72 h      | 45 [33 – 76]    | NA              | 0.12 |
| LDH   | Admission | 508 [315 – 769] | 210 [208 – 253] | 0.34 |
| (U/L) | 24 h      | 400 [288 – 631] | NA              | 1.00 |
|       | 72 h      | 487 [348 – 593] | NA              | 0.37 |

**Table S2.** Description of the study cohorts. *Abbreviations: BMI = body mass index; CAD = coronary artery disease; ECMO = extracorporeal membrane oxygenation; I.U. = International units; NA = not applicable; NIV = non-invasive ventilation; INV = invasive ventilation; SOFA = sequential organ failure assessment.*

| Deceased Patients (n = 16)     |           |                                            |
|--------------------------------|-----------|--------------------------------------------|
| <b>General characteristics</b> |           |                                            |
| Age (year)                     |           | 73 [67–82]                                 |
| Male sex (%)                   |           | 56.3                                       |
| BMI (kg/m <sup>2</sup> )       |           | 28.4 [24.3–31.1]                           |
| ARDS                           | Admission | 5 (31.3%), 2 (12.5%), 5 (31.3%), 4 (25.0%) |
| (no, mild,                     | 24 h      | 4 (28.6%), 2 (14.3%), 6 (42.9%), 2 (14.3%) |
| moderate, severe)              | 72 h      | 2 (14.3%), 3 (21.4%), 7 (50.0%), 2 (14.3%) |
| Murray score                   | Admission | 2.0 [1.3–2.8]                              |
|                                | 24 h      | 1.8 [1.5–2.6]                              |
|                                | 72 h      | 2.3 [2.0–2.9]                              |
| SOFA score                     | Admission | 7.0 [5.3–9.8]                              |
|                                | 24 h      | 5.5 [4.8–9.5]                              |
|                                | 72 h      | 7.5 [4.0–9.3]                              |
| <b>Pre-existing diseases</b>   |           |                                            |
| CAD                            |           | 6 (37.5%)                                  |
| Arterial hypertension          |           | 14 (87.5%)                                 |
| Diabetes mellitus              |           | 8 (50.0%)                                  |
| Chronic kidney disease         |           | 3 (18.8%)                                  |
| <b>Anticoagulation</b>         |           |                                            |
| Prophylactic                   | Admission | 12 (75.0%)                                 |
|                                | 24 h      | 7 (50.0%)                                  |
|                                | 72 h      | 6 (50.0%)                                  |
| Therapeutic                    | Admission | 4 (25.0%)                                  |
|                                | 24 h      | 7 (50.0%)                                  |
|                                | 72 h      | 6 (50.0%)                                  |
| Heparin                        | Admission | 5.0 [4.4–10.0]                             |
| (I.U./kg/d)                    | 24 h      | 6.8 [4.5–11.0]                             |
|                                | 72 h      | 8.7 [3.2–14.9]                             |
| Enoxaparin                     | Admission | 0.8 [0.6–1.2]                              |
| (mg/kg/d)                      | 24 h      | 1.0 [0.9–1.7]                              |

|                      |           |               |
|----------------------|-----------|---------------|
|                      | 72 h      | 1.1 [0.7–1.5] |
| <b>ICU treatment</b> |           |               |
| NIV                  | Admission | 7 (43.8%)     |
|                      | 24 h      | 7 (50.0%)     |
|                      | 72 h      | 4 (28.6%)     |
| INV                  | Admission | 5 (31.3%)     |
|                      | 24 h      | 5 (35.7%)     |
|                      | 72 h      | 10 (71.4%)    |
| ECMO                 | Admission | 0 (0.0%)      |
|                      | 24 h      | 0 (0.0%)      |
|                      | 72 h      | 1 (7.1%)      |
| Dialysis             | Admission | 1 (6.3%)      |
|                      | 24 h      | 2 (14.3%)     |
|                      | 72 h      | 4 (28.6%)     |

**Table S3:** Results of ROTEM Analysis. Abbreviations: APT<sub>EM</sub> = aprotinin-based thromboelastometry; CFT = clot formation time; CT = clotting time; EX<sub>TEM</sub> = extrinsically activated thromboelastometry; FIB<sub>TEM</sub> = fibrinogen-based thromboelastometry; IN<sub>TEM</sub> = intrinsically activated thromboelastometry; MCF = maximum clot firmness; ML = maximum lysis.

|                                |           | COVID-19 (n = 29) | Controls (n = 29) |
|--------------------------------|-----------|-------------------|-------------------|
| EX <sub>TEM</sub> CT (sec)     | Admission | 87 [72 – 125]     | 72 [66 – 84]      |
|                                | 24 h      | 87 [77 – 94]      |                   |
|                                | 72 h      | 87 [76 – 99]      |                   |
| EX <sub>TEM</sub> CFT (sec)    | Admission | 59 [44 – 73]      | 74 [53 – 95]      |
|                                | 24 h      | 55 [41 – 65]      |                   |
|                                | 72 h      | 51 [45 – 72]      |                   |
| EX <sub>TEM</sub> $\alpha$ (°) | Admission | 78 [75 – 81]      | 75 [71 – 79]      |
|                                | 24 h      | 79 [77 – 82]      |                   |
|                                | 72 h      | 80 [76 – 81]      |                   |
| EX <sub>TEM</sub> A10 (mm)     | Admission | 69 [62 – 73]      | 61 [53 – 69]      |
|                                | 24 h      | 71 [64 – 73]      |                   |
|                                | 72 h      | 70 [65 – 75]      |                   |
| EX <sub>TEM</sub> A20 (mm)     | Admission | 74 [67 – 77]      | 67 [60 – 74]      |
|                                | 24 h      | 75 [69 – 77]      |                   |
|                                | 72 h      | 74 [72 – 79]      |                   |
| EX <sub>TEM</sub> MCF (mm)     | Admission | 75 [69 – 77]      | 68 [61 – 75]      |
|                                | 24 h      | 76 [69 – 77]      |                   |
|                                | 72 h      | 75 [72 – 79]      |                   |
| EX <sub>TEM</sub> ML (%)       | Admission | 0 [0 – 3]         | 10 [3 – 11]       |
|                                | 24 h      | 0 [0 – 2]         |                   |
|                                | 72 h      | 0 [0 – 1]         |                   |
| IN <sub>TEM</sub> CT (sec)     | Admission | 231 [208 – 281]   | 216 [183 – 244]   |
|                                | 24 h      | 249 [196 – 299]   |                   |
|                                | 72 h      | 254 [200 – 324]   |                   |
| IN <sub>TEM</sub> CFT (sec)    | Admission | 52 [44 – 74]      | 69 [58 – 83]      |

|                        |           |                |                 |
|------------------------|-----------|----------------|-----------------|
|                        | 24 h      | 53 [44 – 71]   |                 |
|                        | 72 h      | 53 [45 – 71]   |                 |
| INTEM $\alpha$ (°)     | Admission | 80 [75 – 81]   | 76 [73 – 78]    |
|                        | 24 h      | 79 [76 – 81]   |                 |
|                        | 72 h      | 79 [77 – 81]   |                 |
| INTEM A10 (mm)         | Admission | 69 [61 – 70]   | 57 [55 – 65]    |
|                        | 24 h      | 68 [62 – 71]   |                 |
|                        | 72 h      | 70 [63 – 71]   |                 |
| INTEM A20 (mm)         | Admission | 73 [68 – 74]   | 62 [60-69]      |
|                        | 24 h      | 72 [67 – 75]   |                 |
|                        | 72 h      | 73 [68 – 76]   |                 |
| INTEM MCF (mm)         | Admission | 74 [67 – 75]   | 64 [61 – 70]    |
|                        | 24 h      | 73 [68 – 75]   |                 |
|                        | 72 h      | 74 [68 – 76]   |                 |
| INTEM ML (%)           | Admission | 0 [0 – 3]      | 8 [4 – 13]      |
|                        | 24 h      | 0 [0 – 1]      |                 |
|                        | 72 h      | 0 [0 – 1]      |                 |
| FIBTEM CT (sec)        | Admission | 80 [71 – 114]  | 69 [64 – 75]    |
|                        | 24 h      | 80 [69 – 93]   |                 |
|                        | 72 h      | 79 [71 – 97]   |                 |
| FIBTEM CFT (sec)       | Admission | 90 [60 – 124]  | 312 [115 – 760] |
|                        | 24 h      | 99 [60 – 124]  |                 |
|                        | 72 h      | 69 [57 – 93]   |                 |
| FIBTEM $\alpha$ (°)    | Admission | 75 [73 – 79]   | 75 [71 – 78]    |
|                        | 24 h      | 77 [73 – 81]   |                 |
|                        | 72 h      | 78 [73 – 80]   |                 |
| FIBTEM A10 (mm)        | Admission | 31 [25 – 39]   | 20 [17 – 27]    |
|                        | 24 h      | 33 [25 – 39]   |                 |
|                        | 72 h      | 33 [29 – 38]   |                 |
| FIBTEM A20 (mm)        | Admission | 35 [28 – 42]   | 22 [18 – 28]    |
|                        | 24 h      | 35 [27 – 42]   |                 |
|                        | 72 h      | 36 [31 – 40]   |                 |
| FIBTEM MCF (mm)        | Admission | 35 [28 – 43]   | 23 [18 – 28]    |
|                        | 24 h      | 35 [27 – 43]   |                 |
|                        | 72 h      | 38 [33 – 41]   |                 |
| FIBTEM ML (%)          | Admission | 0 [0 – 0]      | 4 [0 – 8]       |
|                        | 24 h      | 0 [0 – 0]      |                 |
|                        | 72 h      | 0 [0 – 0]      |                 |
| APTEM CT (%EXTEM CT)   | Admission | 97 [85 – 101]  | 93 [86 – 100]   |
|                        | 24 h      | 92 [88 – 101]  |                 |
|                        | 72 h      | 96 [93 – 99]   |                 |
| APTEM CFT (%EXTEM CFT) | Admission | 107 [96 – 123] | 96 [91 – 108]   |
|                        | 24 h      | 106 [95 – 113] |                 |

|                                      |           |                 |                 |
|--------------------------------------|-----------|-----------------|-----------------|
|                                      | 72 h      | 102 [93 – 108]  |                 |
| APTEM $\alpha$<br>(%EXTEM $\alpha$ ) | Admission | 99 [98 – 100]   | 100 [100 – 103] |
|                                      | 24 h      | 100 [99 – 101]  |                 |
|                                      | 72 h      | 100 [99 – 102]  |                 |
| APTEM A10<br>(%EXTEM A10)            | Admission | 97 [96 – 100]   | 100 [97 – 101]  |
|                                      | 24 h      | 98 [96 – 100]   |                 |
|                                      | 72 h      | 100 [97 – 101]  |                 |
| APTEM A20<br>(%EXTEM A20)            | Admission | 97 [97 – 99]    | 100 [98 – 100]  |
|                                      | 24 h      | 99 [97 – 100]   |                 |
|                                      | 72 h      | 99 [97 – 100]   |                 |
| APTEM MCF<br>(%EXTEM MCF)            | Admission | 97 [97 – 99]    | 100 [98 – 101]  |
|                                      | 24 h      | 99 [97 – 100]   |                 |
|                                      | 72 h      | 99 [97 – 100]   |                 |
| APTEM ML<br>(%EXTEM ML)              | Admission | 100 [100 – 100] | 100 [82 – 100]  |
|                                      | 24 h      | 100 [100 – 100] |                 |
|                                      | 72 h      | 100 [96 – 100]  |                 |

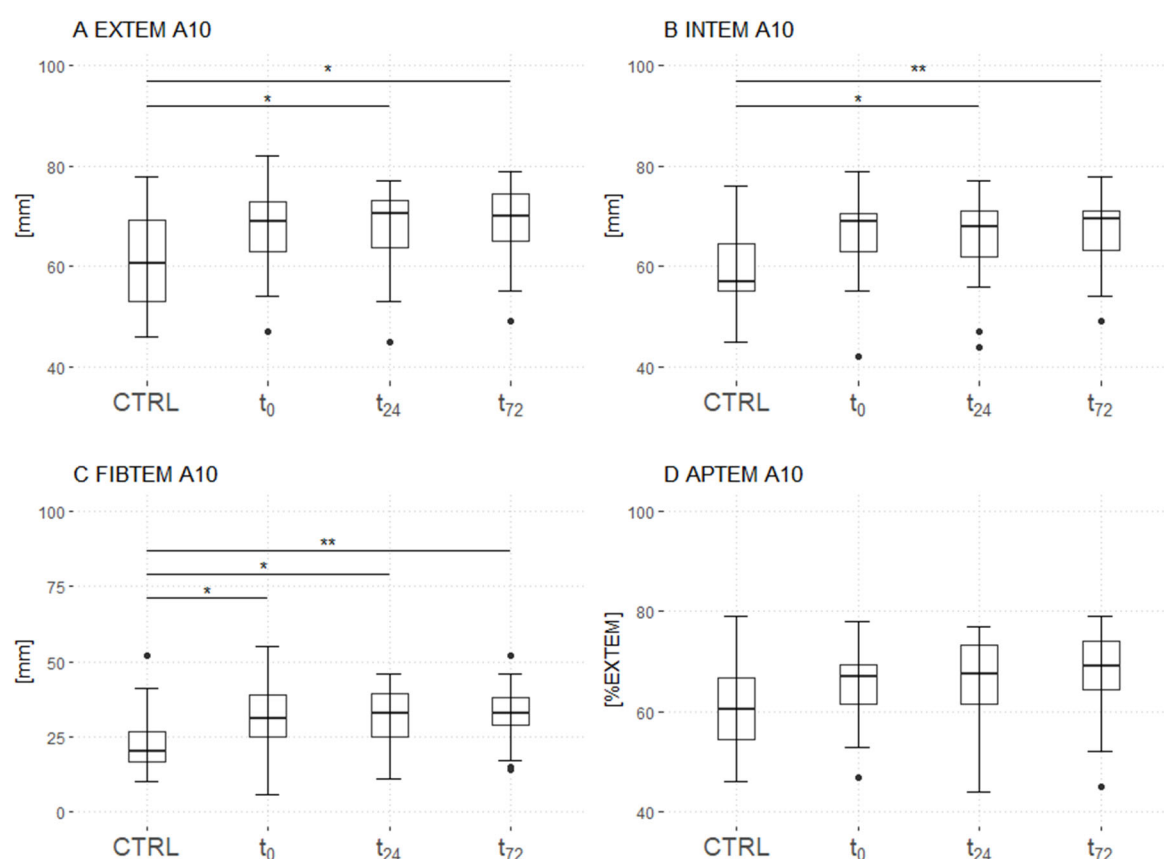

**Figure S1: Time course of thromboelastometry A10.** Patients with COVID-19 presented a significantly increased A10 24 and 72 hours after admission to the ICU in the EXTEM (A) and INTEM assays (B) compared with controls. In the FIBTEM assay (C), the A10 increased in patients with COVID-19 at all timepoints compared with that in controls. In the APTEM assay (D), no differences of A10 were recorded compared with the control group. Asterisks display the degree of statistical significance: \*:  $p < 0.05$ , \*\*:  $p < 0.01$ . Abbreviations: A10 = amplitude 10

minutes after clotting time; APTEM = aprotinin-based thromboelastometry; CTRL = control group; EXTEM = extrinsically activated thromboelastometry; FIBTEM = fibrinogen-based thromboelastometry; INTEM = intrinsically activated thromboelastometry.

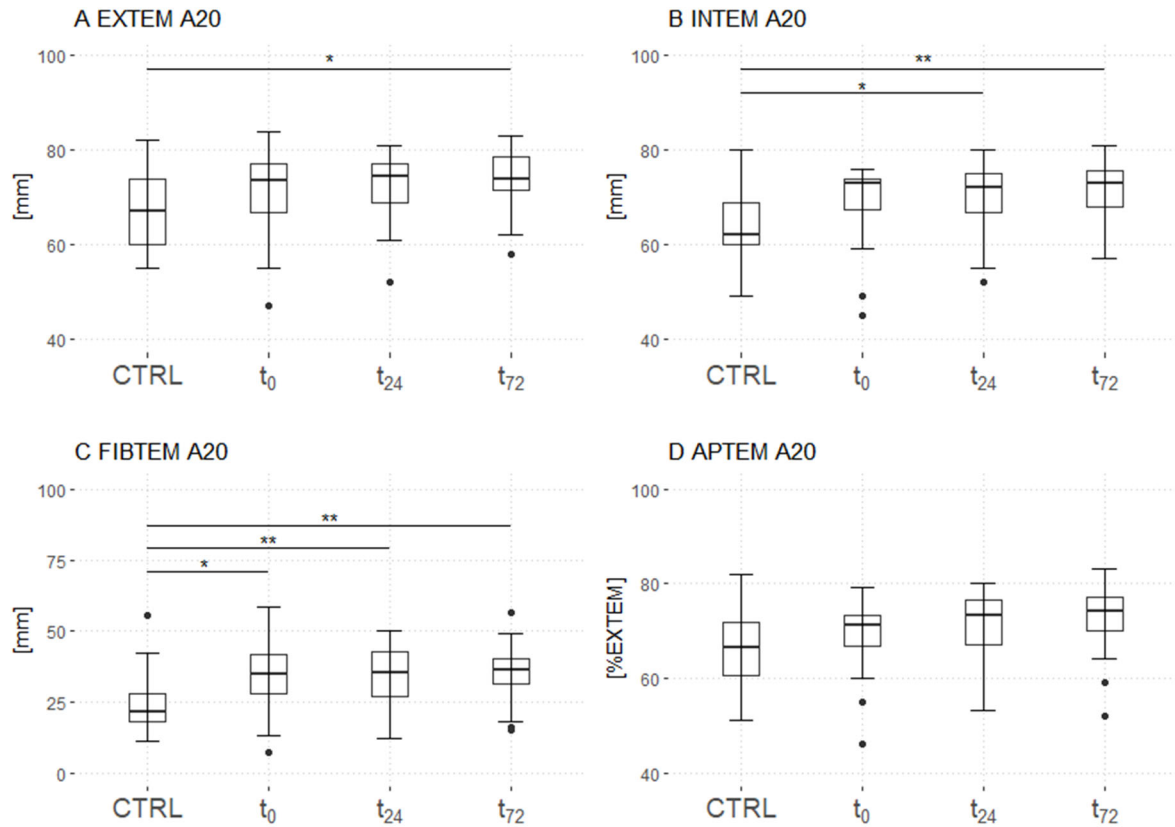

**Figure S2: Time course of thromboelastometry A20.** Patients with COVID-19 presented a significantly increased A20 72 hours after admission to the ICU in the EXTEM (A) and INTEM assays (B) compared with controls. Further, elevated values of A20 were also measured at t<sub>24</sub> in INTEM assay (B) compared with control group. In the FIBTEM assay (C), the A20 increased in patients with COVID-19 at all timepoints compared with that in controls. In the APTEM assay (D), no differences of A20 were recorded compared with the control group. Asterisks display the degree of statistical significance: \*:  $p < 0.05$ , \*\*:  $p < 0.01$ . Abbreviations: A20 = amplitude 20 minutes after clotting time; APTEM = aprotinin-based thromboelastometry; CTRL = control group; EXTEM = extrinsically activated thromboelastometry; FIBTEM = fibrinogen-based thromboelastometry; INTEM = intrinsically activated thromboelastometry.
